# Supplementary material for: Improving the electrochemical performance of Li1.2Mn0.52Co0.13Ni0.13O2 by surface nitrogen doping via plasma treatment
Source: Royal Society of Chemistry journal article supplement (doi:10.1039/c6ra04922b), 2016-01-01
Supplement: c6ra04922b1.pdf [file c6ra04922b1.pdf]

## Improving Electrochemical Performance of $\text{Li}_{1.2}\text{Mn}_{0.52}\text{Co}_{0.13}\text{Ni}_{0.13}\text{O}_2$ by Surface Nitrogen Doping via the Plasma Treatment

Bing Li<sup>a</sup>, Chao Li<sup>b</sup>, Zulai Cao<sup>b</sup>, Jing wang<sup>b</sup>, Jinbao Zhao<sup>\*a,b</sup>

<sup>a</sup>College of Energy, School of Energy Research, Xiamen University, Xiamen, 361005, P. R. China

<sup>b</sup>State Key Lab of Physical Chemistry of Solid Surfaces, Collaborative Innovation Center of Chemistry for Energy Materials, College of Chemistry and Chemical Engineering, Xiamen University, Xiamen, 361005, P. R. China.

E-mail: jbzha@xmu.edu.cn

In order to further discuss the effect of surface nitrogen doping, the diffusion coefficient of  $\text{Li}^+$  can be calculated from the EIS plots (Fig.4b) in the the Warburg region using the following equation:

$$Z' = R_s + R_{ct} + \sigma \omega^{-0.5} \quad (1)$$

$$D = R^2 T^2 / 2 A^2 n^4 F^4 C^2 \sigma^2 \quad (2)$$

where  $R$  is the gas constant,  $T$  is the absolute temperature,  $A$  is the surface area of the cathode electrode,  $n$  is the number of electrons per molecule during oxidization,  $F$  is the Faraday constant,  $C$  is the  $\text{Li}^+$  concentration, and  $\sigma$  is the Warburg factor associated with  $Z'_{re}$ . Due to  $Z'$  is proportional to  $\sigma \omega^{-1/2}$ , the value of  $\sigma$  can be obtained by linear fitting of the relationship plot  $Z' - \omega^{-0.5}$  (Fig. S1). According to equation (1, 2), the apparent diffusion coefficient  $D_{\text{Li}}$  can be obtained.

The diffusion coefficient of  $\text{Li}^+$  in pristine is  $5.16 \times 10^{-15} \text{ cm}^2 \cdot \text{s}^{-1}$ , while that of the P1 is  $1.49 \times 10^{-14} \text{ cm}^2 \cdot \text{s}^{-1}$ . Obviously, the diffusion coefficient of  $\text{Li}^+$  is greatly improved due to the surface nitrogen doping.

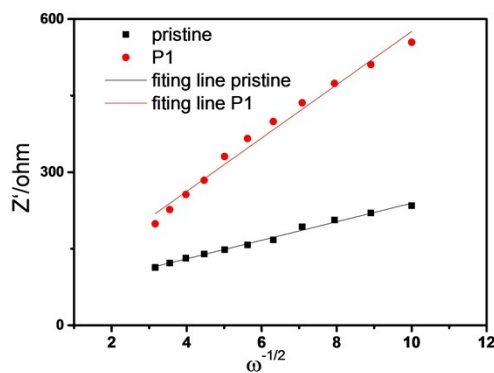

Fig. S1  $Z' - \omega^{-0.5}$  pattern in the low-frequency region obtained from EIS measurements of pristine and P1.
